# Supplementary material for: Excellent performance in hydrogenation of esters over Cu/ZrO2 catalyst prepared by bio-derived salicylic acid
Source: Royal Society of Chemistry journal article supplement (doi:10.1039/c6cy00715e), 2016-01-01
Supplement: c6cy00715e1.pdf [file c6cy00715e1.pdf]

1 *Supplementary material for*  
2 **The Excellent Performance in Hydrogenation of Esters over**  
3 **Cu/ZrO<sub>2</sub> Catalyst Prepared by Bio-Derived Salicylic Acid**

4 Jian Ding<sup>ab</sup>, Yanting Liu<sup>ab</sup>, Juan Zhang<sup>a</sup>, Kefeng Liu<sup>c</sup>, Haicheng Xiao<sup>c</sup>, Fanhua Kong<sup>c</sup>,

5 Yanping Sun<sup>d</sup>, and Jiangang Chen<sup>\*a</sup>

6 <sup>a</sup> State Key Laboratory of Coal Conversion, Shanxi Institute of Coal Chemistry,

7 Chinese Academy of Sciences, Taiyuan 030001, Shanxi, PR China

8 <sup>b</sup> University of Chinese Academy of Sciences, Beijing 100049, PR China

9 <sup>c</sup> Petrochemical Research Institute of PetroChina Company Limited, Beijing 100029,

10 PR China

11 <sup>d</sup> Chemical Engineering Department, Taiyuan University of Technology, Taiyuan

12 030001, PR China

13 \* Corresponding author. Tel.: +86 0351 4040290; fax: +86 0351 4040290.

14 E-mail: [chenjg@sxicc.ac.cn](mailto:chenjg@sxicc.ac.cn).

15

16

17

18

19

20

21

22

23

24

25

26

- 1 Preparation of the Cu/ZrO<sub>2</sub> catalyst with the aid of bio-derived organic
- 2 carboxylic acids or not

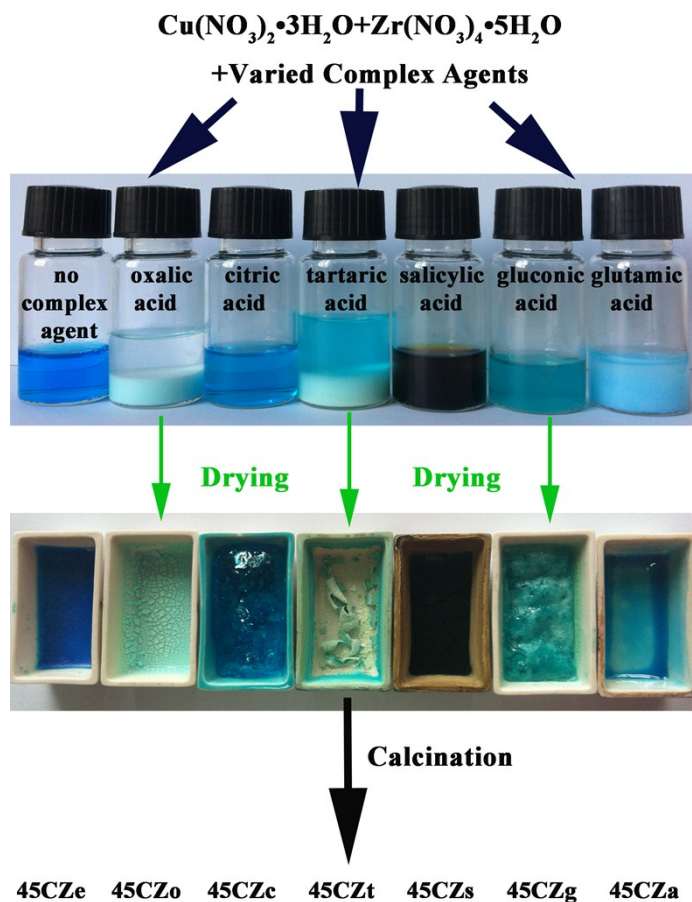

3

4 **Scheme S1.** Schematic view of preparing binary Cu/ZrO<sub>2</sub> catalyst using varied organic carboxylic

5 acids.

6 The conversion and selectivity of products for the DEO conversion were

7 calculated based on the following equations [Eq. (1-3)]:

8

$$\text{Conversion} = \left(1 - \frac{\text{Amount of DEO after reaction (mol)}}{\text{Total amount of DEO in feed (mol)}}\right) \times 100\% \quad (1)$$

9

$$\text{Selectivity} = \frac{\text{Amount of a product (mol)}}{\text{Total amount of DEO converted (mol)}} \times 100\% \quad (2)$$

10

$$STY_{EG} = \frac{\text{Conv. of DEO} \times LHSV \times \rho_{DEO} \times \text{Sel. of EG} \times \text{Molecular weight of EG}}{\text{Molecular weight of DEO}} \quad (\text{g}_{EG} \text{ g}_{cat}^{-1} \text{ h}^{-1})$$

1 (3)

2 The turnover frequency (TOFs), as defined as the number of converted DEO  
3 molecules in 1 h over one active site, was calculated based on the following equation:

$$\begin{aligned} TOF^0 &= \frac{DEO \text{ conversion rate (mol g}_{cat}^{-1} h^{-1})}{\text{Numbers of Cu sites (mol g}_{cat}^{-1})} \\ &= \frac{\text{Conv. of DEO} \times LHSV \times \rho_{DEO} \text{ (g}_{DEO} \text{ g}_{cat}^{-1} h^{-1})}{\text{Molecular weight of DEO} \times \text{Numbers of Cu sites (mol g}_{cat}^{-1})} \end{aligned} \quad (4)$$

5 The numbers of surface Cu sites were determined by N<sub>2</sub>O nitration. To obtain the  
6 intrinsic activity of catalysts, the DEO conversion was kept below 50% and EG yield  
7 was kept less than 10% at high WLHSV of 12.0 h<sup>-1</sup>.

#### 8 **Particle sizes calculated by the Scherrer equation**

9 The crystallite sizes were calculated from the line-broadening of the XRD peaks  
10 by the Scherrer equation using the (111) peak position [Eq. (5)].

$$11 \quad d = \frac{K \lambda}{FW \cos \theta} \quad (5)$$

12 Where K is a constant generally taken as unity (0.89);  $\lambda$  is the wavelength of the  
13 incident radiation (0.15405 nm); FW is the full width at half maximum and  $\theta$  is the  
14 peak position.

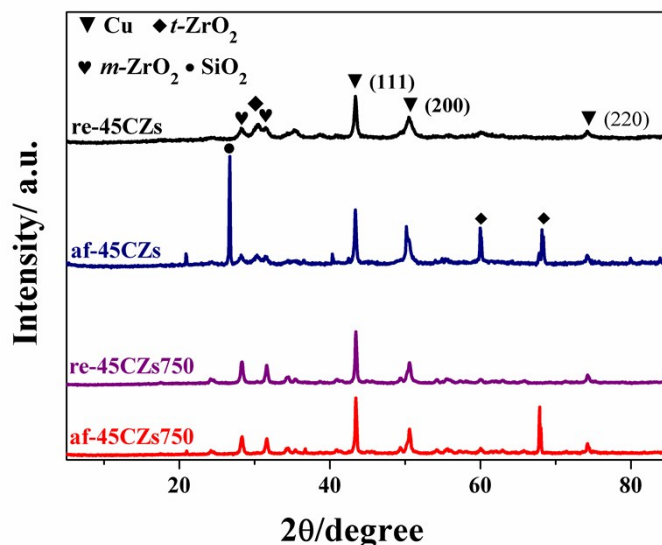

1

2 **Figure S1.** XRD patterns of the pre-reduced catalysts (denoted as re-45CZs and re-45CZs750) and  
 3 used catalysts after esters hydrogenation (denoted as af-45CZs and af-45CZs750).

#### 4 **The measurement of specific Cu<sup>0</sup> surface areas of the catalysts**

5 The specific surface area of metallic copper was measured by N<sub>2</sub>O oxidation and  
 6 followed H<sub>2</sub> reduction using the procedure described by Van Der Grift et al.<sup>1-3</sup> The  
 7 procedures described here were performed on a homemade apparatus and the profiles  
 8 was shown in Figure S2-3.<sup>4</sup> Generally, catalysts (60 mg) were first reduced in 5%  
 9 H<sub>2</sub>/N<sub>2</sub> mixture at a flow rate of 50 mL min<sup>-1</sup> with a ramping rate of 10 °C min<sup>-1</sup> until  
 10 350 °C. The amount of hydrogen consumption in the first TPR (TPR1) was denoted as  
 11 X. And then the reactor was purged with Ar to 50 °C. N<sub>2</sub>O (30 mL min<sup>-1</sup>) was injected  
 12 to oxidize surface copper atoms to Cu<sub>2</sub>O at 50 °C for 15 min. Subsequently, the  
 13 reactor was flushed with Ar to remove the oxidant. Finally, another TPR experiment  
 14 was performed in 5% H<sub>2</sub>/N<sub>2</sub> at a flow rate of 50 mL min<sup>-1</sup>. Hydrogen consumption in  
 15 the second TPR (TPR1) was denoted as Y. The dispersion of Cu and exposed Cu  
 16 surface area were calculated according to the equations which were shown below:

1 Reduction of all copper atoms:

2  $\text{CuO} + \text{H}_2 \rightarrow \text{Cu} + \text{H}_2\text{O}$ , hydrogen consumption in the first TPR1 = X.

3 the decomposition of  $\text{N}_2\text{O}$  on the surface of metallic copper:

4  $2\text{Cu} + \text{N}_2\text{O} = \text{N}_2 + (\text{Cu}-\text{O}-\text{Cu})_s$ .

5 Reduction of surface copper atoms only:

6  $\text{Cu}_2\text{O} + \text{H}_2 \rightarrow 2\text{Cu} + \text{H}_2\text{O}$ , hydrogen consumption in this TPR2 = Y;

7 And the dispersion of Cu and exposed Cu surface area were calculated as [Eq. (6, 7)]:

8 
$$D = \frac{2Y}{X} \times 100\% \quad (6)$$

9 
$$S = \frac{2Y \times N_{av}}{X \times M_{Cu} \times 1.4 \times 10^{19}} = \frac{1353Y}{X} (\text{m}^2 - \text{Cu} / \text{g} - \text{Cu}) \quad (7)$$

10 where  $N_{av}$  is the Avogadro's constant,  $M_{Cu}$  is the relative atomic mass (63.5 g mol<sup>-1</sup>),

11  $1.4 \times 10^{19}$  comes from that an equal abundance of an average copper surface atom

12 area of 0.0711 nm<sup>2</sup>, equivalent to  $1.4 \times 10^{19}$  copper atoms m<sup>-2</sup>.<sup>3</sup>

13 Average volume-surface diameter ( $d_{Cu}$ ) can be expressed as a function [Eq. (8)]:

14 
$$d_{v.s.} = \frac{6}{(S \times \rho_{Cu})} \approx 0.5 \frac{X}{Y} (\text{nm}) \quad (8)$$

15 where,  $\rho_{Cu}$  is the density of copper (8.9 g cm<sup>-3</sup>).

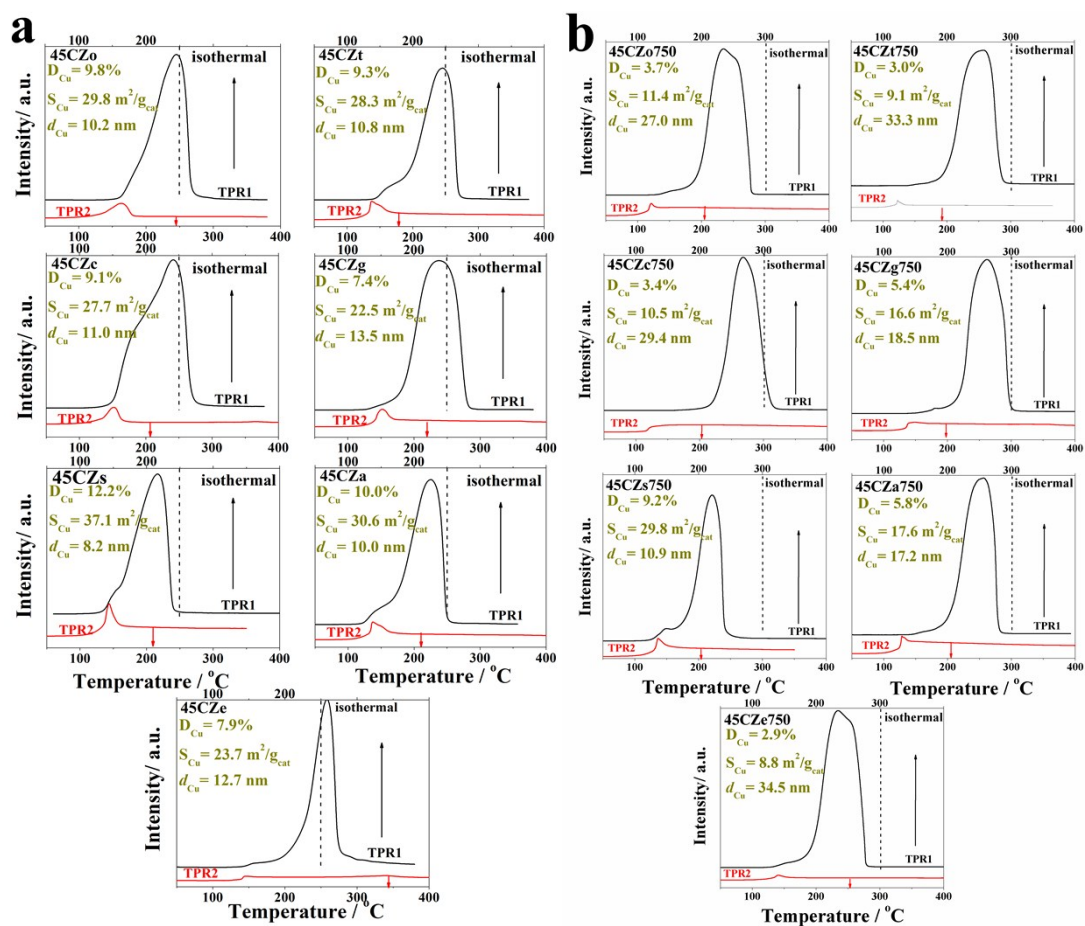

1

2 **Figure S2.** The profiles of Cu metal surface area of (a) 45CZx and (b) 45CZx750 catalysts

3

determined by the  $\text{N}_2\text{O}$  titration method.

4

5

6

7

8

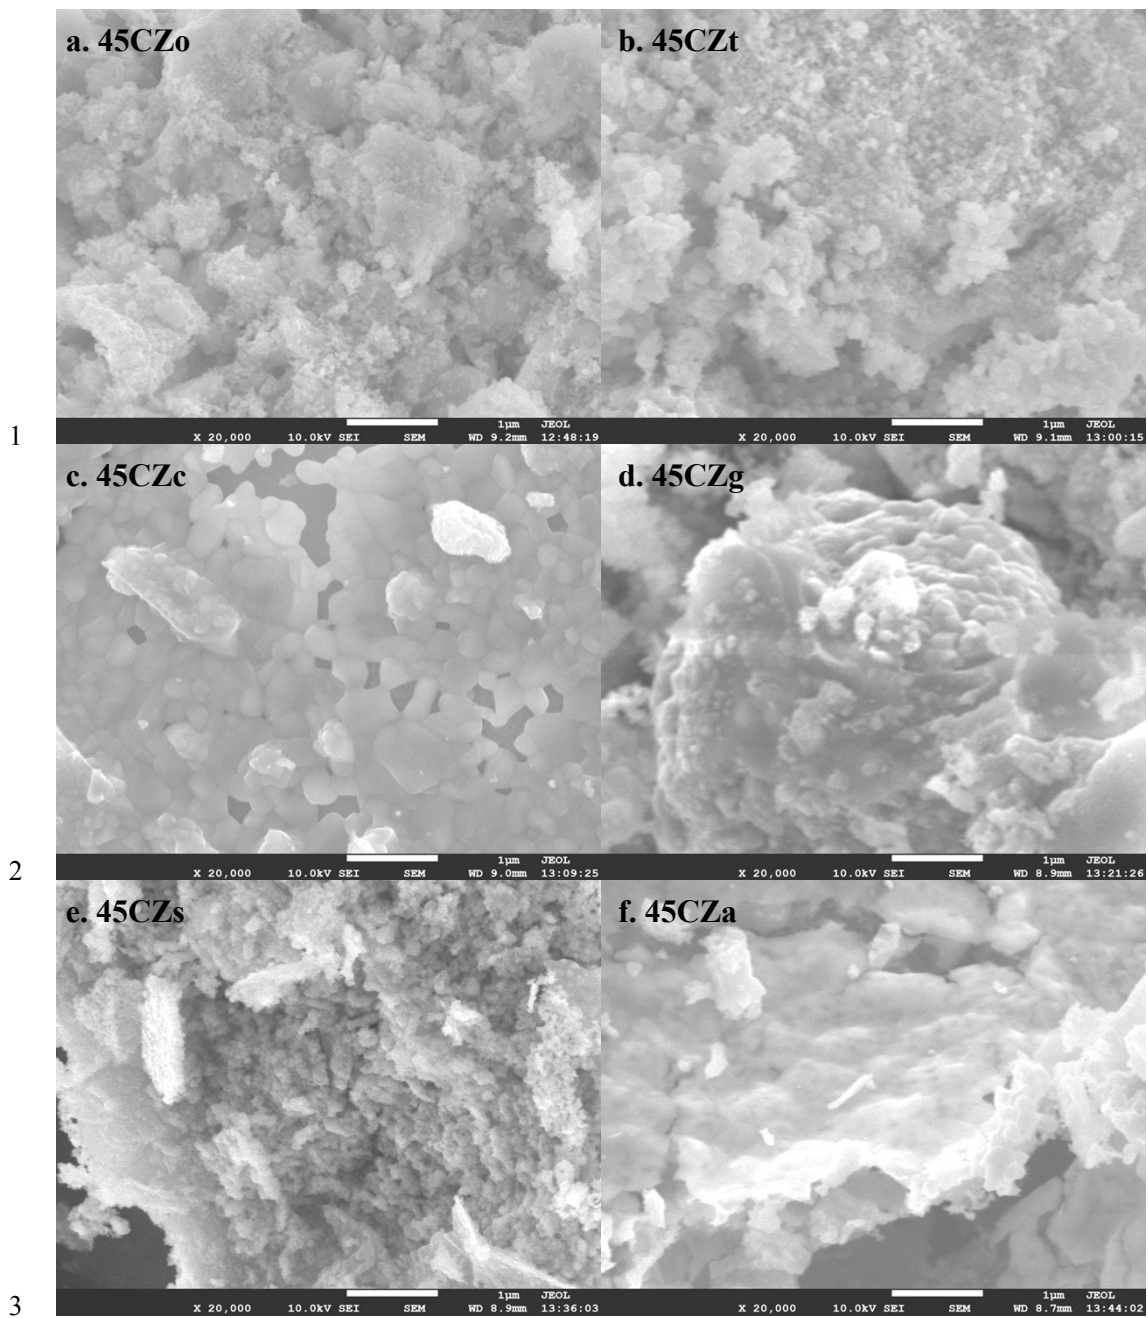

**Figure S3.** SEM images of the 45CZx catalysts.

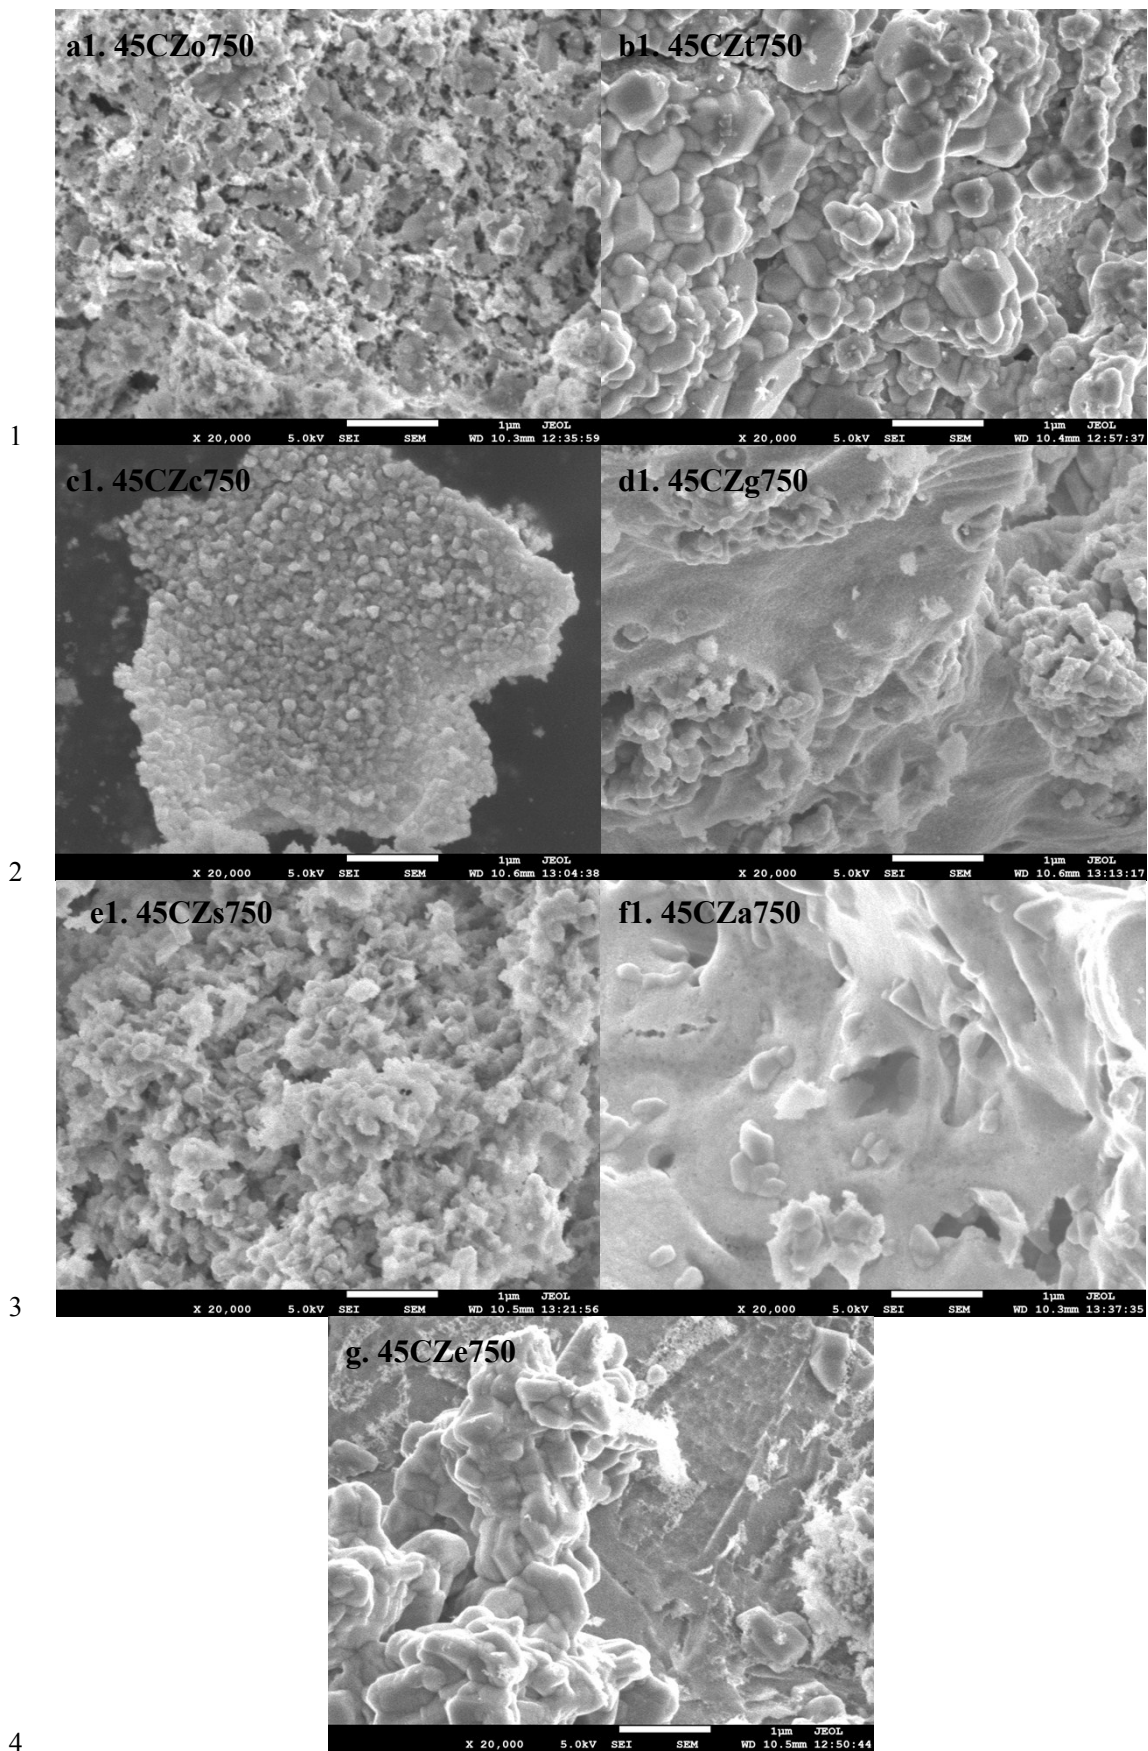

Figure S4. SEM images of the 45CZx750 catalysts.



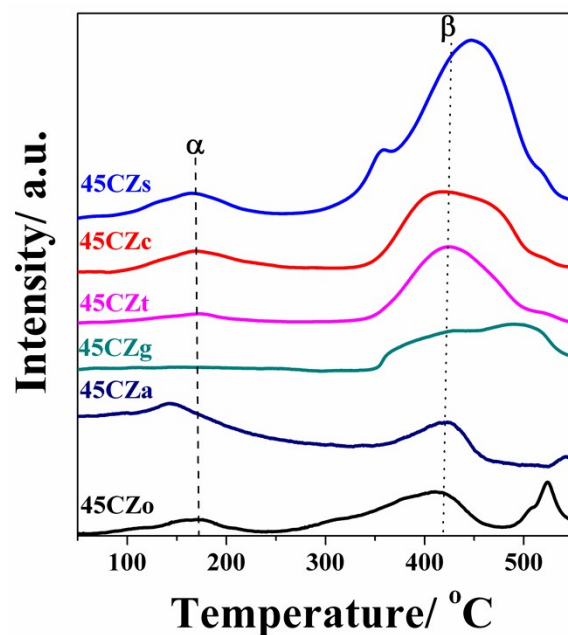

Figure S5. H<sub>2</sub>-TPD profiles of the 45CZ<sub>x</sub> catalysts.

1  
2  
3 The hydrogen activation over the reduced 45CZ<sub>x</sub> catalysts was tested by H<sub>2</sub>-TPD  
4 and the profiles were shown in Figure S5. Several H<sub>2</sub> desorption peaks appeared for  
5 all the samples, which were similar at temperature, but varying greatly in the strength.  
6 According to the reports,<sup>5, 6</sup> the resolved peak at low temperature (110–220 °C) could  
7 be ascribable to the associative adsorbed H<sub>2</sub> on the highly dispersed Cu.<sup>7, 8</sup> While a  
8 much broader signal in the range of 350–500 °C monitored the desorption of hydrogen  
9 from the split H–H on the surface of Cu–ZrO<sub>2</sub> interfaces or CuH<sub>x</sub>.<sup>9, 10</sup> Interestingly,  
10 the intensities of the H<sub>2</sub> desorption peaks of the 45CZ<sub>x</sub> catalysts were closely affected  
11 by the complex agent used. Apparently, the peak α enhanced in 45CZs and lowered in  
12 other samples, especially absent in 45CZg (curves in Figure S5). It indicated that there  
13 were more active sites for associative adsorption of H<sub>2</sub> because of the existing of  
14 highly dispersed CuO particles over 45CZs. Frankly, no desorption peak was  
15 observed in the low temperature range over 45CZg, which due to lacking the highly

1 dispersed Cu species as confirmed by XRD and TPR (Figures 1 and 5). Similarly, the  
2 H<sub>2</sub> desorption peak β was maximum for 45CZs and was much greater than that of  
3 45CZo, 45CZc, 45CZt, and 45CZa. The huge high-temperature peak β of 45CZs was  
4 attributed to the synergism between *t*-ZrO<sub>2</sub> and the Cu active sites for facile H<sub>2</sub>  
5 dissociation which was helpful to form CuH<sub>x</sub>. Taken together, the H<sub>2</sub> activation ability  
6 of 45CZ<sub>x</sub> deduced from TPD profiles followed the sequence of 45CZs > 45CZc >  
7 45CZt > 45CZa > 45CZg > 45CZo. Generally, the catalyst which possessed a higher  
8 D<sub>Cu</sub> and S<sub>Cu</sub> showed the stronger H<sub>2</sub> desorption peaks both located at ca. 160 and 450  
9 °C, implying that surface Cu atoms were highly correlated with the formation of the  
10 chemisorbed H species. Moreover, the increasing content of crystalline ZrO<sub>2</sub> can  
11 indirectly improve the rate of efficient hydrogen activation and promote the surface  
12 concentration of active hydrogen species via the synergism between the Cu species  
13 and ZrO<sub>2</sub>. It was postulated that these enhanced H<sub>2</sub> activation ability would improve  
14 its activity for esters hydrogenation.

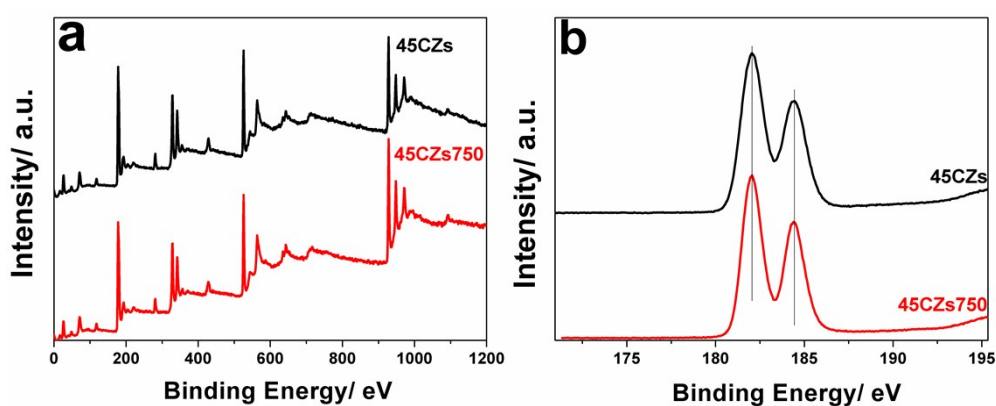

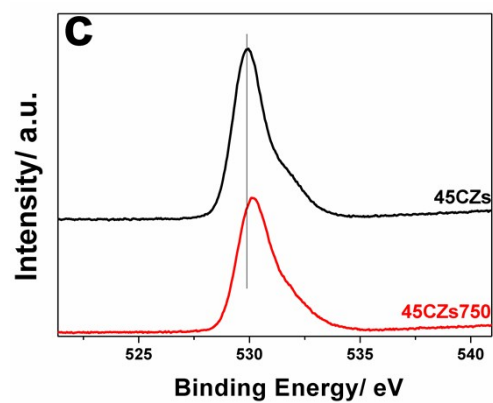

1

2 **Figure S6.** XPS spectra (a), Zr 3d spectra (b), and O 1s spectra (c) of the 45CZs and 45CZs750

3

catalysts.

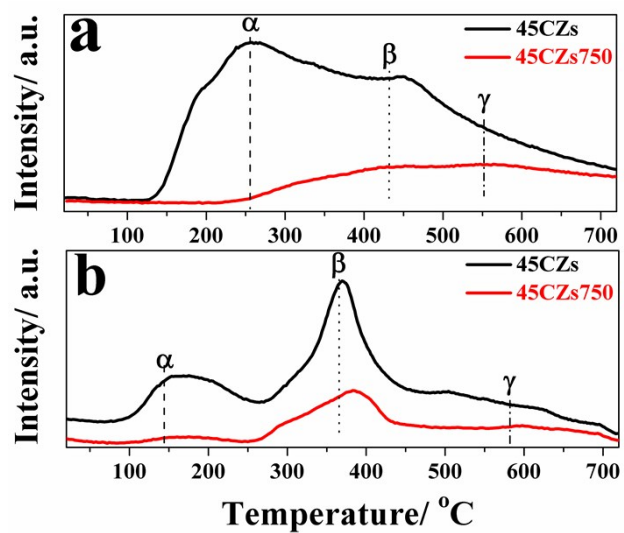

4

5 **Figure S7.** NH<sub>3</sub>-TPD (a) and CO<sub>2</sub>-TPD (b) profiles of the 45CZs and 45CZs750 catalysts.

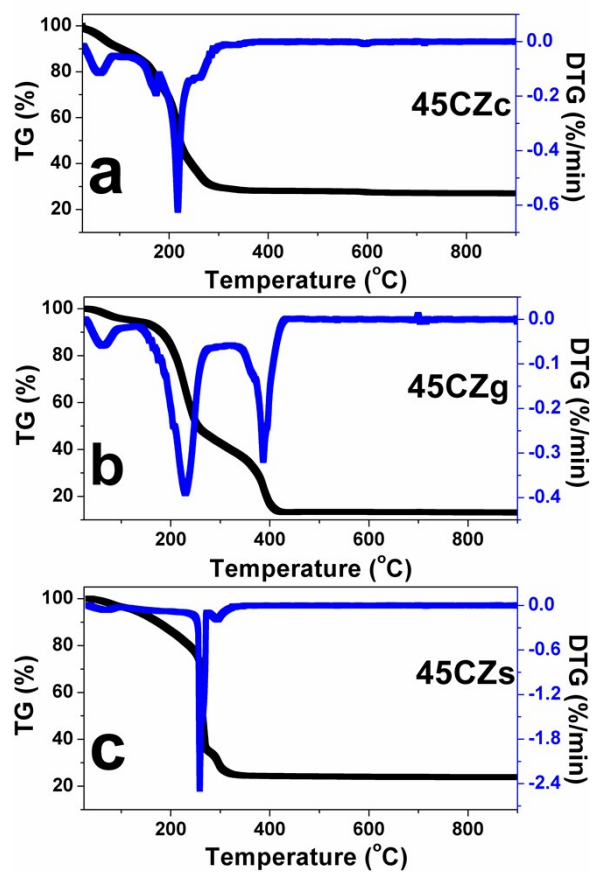

1

2 **Figure S8.** TG and DTG curves for the precursors of (a) 45CZc, (b) 45CZg, and (c) 45CZs

3

catalysts.

4

5

6

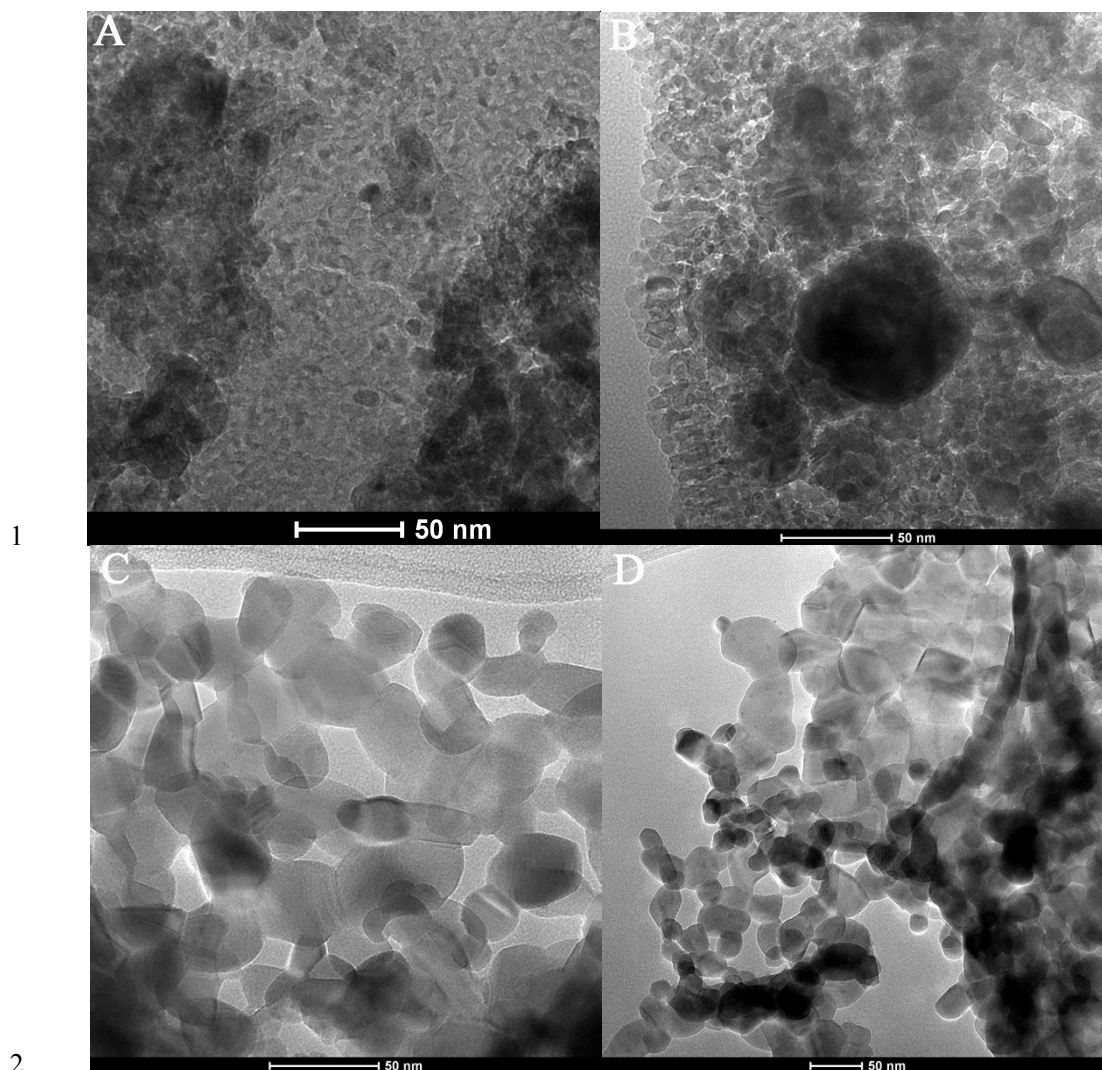

1  
2  
3 **Figure S9.** TEM images of the pre-reduced catalysts (A: re-45CZs and C: re-45CZs750) and used  
4 catalysts after esters hydrogenation (B: af-45CZs and D: af-45CZs750).

## 5 References

- 6 1. J. Evans, M. Wainwright, A. Bridgewater and D. Young, *Appl. Catal.*, 1983, **7**, 75-83.  
7 2. S. Sato, R. Takahashi, T. Sodesawa, K. I. Yuma and Y. Obata, *J. Catal.*, 2000, **196**, 195-199.  
8 3. C. Van Der Grift, A. Wielers, B. Jogh, J. Van Beunum, M. De Boer, M. Versluijs-Helder and  
9 J. Geus, *J. Catal.*, 1991, **131**, 178-189.  
10 4. H. Boer, W. Boersma and N. Wagstaff, *Rev. Sci. Instrum.*, 1982, **53**, 349-361.  
11 5. I. Melian-Cabrera, M. L. Granados and J. Fierro, *J. Catal.*, 2002, **210**, 285-294.  
12 6. S. Xia, Z. Yuan, L. Wang, P. Chen and Z. Hou, *Appl. Catal., A*, 2011, **403**, 173-182.  
13 7. X. Dong, H. B. Zhang, G. D. Lin, Y. Z. Yuan and K. R. Tsai, *Catal. Lett.*, 2003, **85**, 237-246.  
14 8. J. Ahlers, J. Grasser, B. Loveless and D. Muggli, *Catal. Lett.*, 2007, **114**, 185-191.  
15 9. H. Wilmer, T. Genger and O. Hinrichsen, *J. Catal.*, 2003, **215**, 188-198.

- 1 10. F. Arena, G. Italiano, K. Barbera, S. Bordiga, G. Bonura, L. Spadaro and F. Frusteri, *Appl.*  
2 *Catal., A*, 2008, **350**, 16-23.
